# Supplementary material
Source: PubMed Central journal article supplement (PMC1785095)

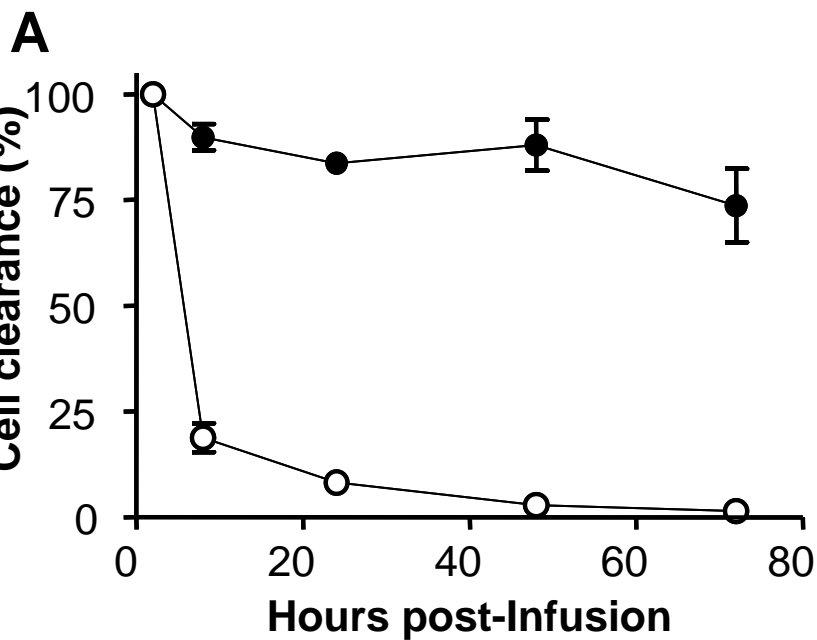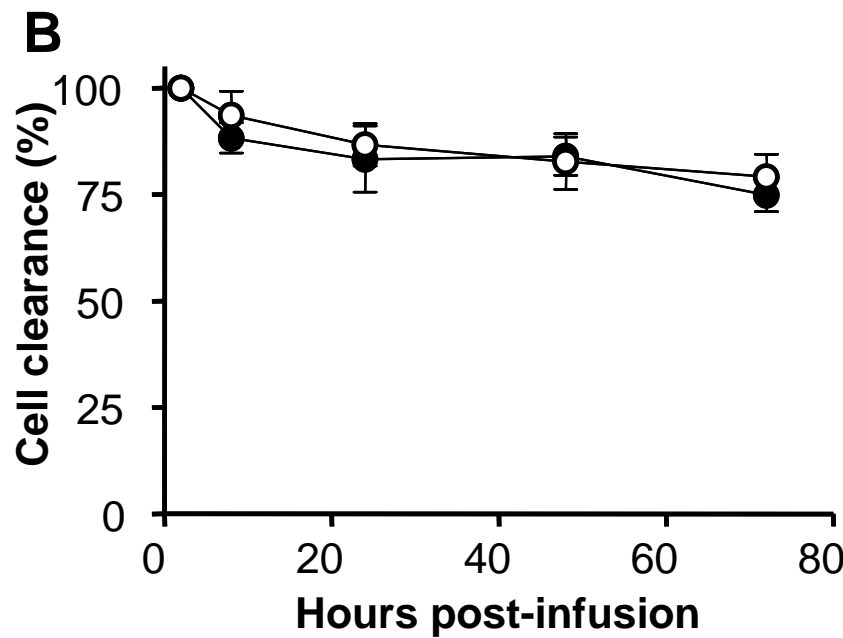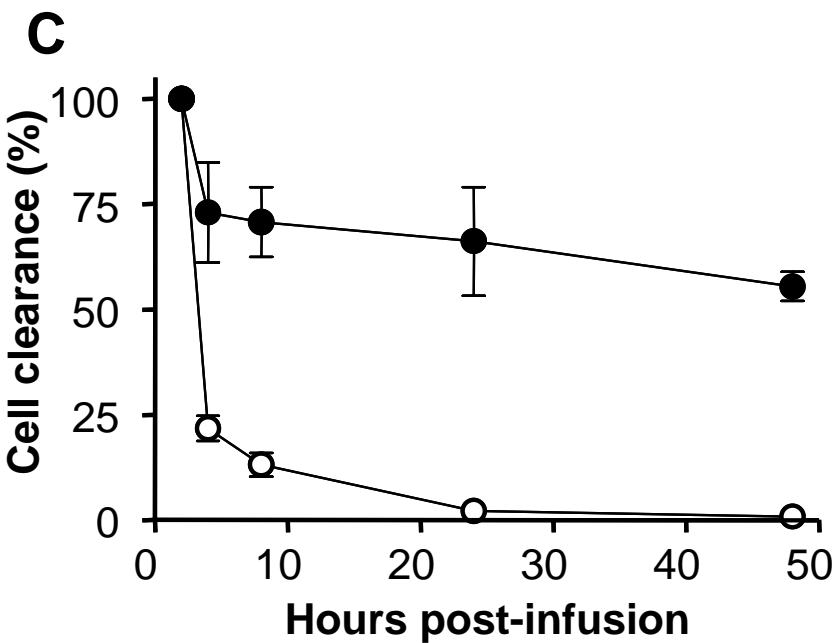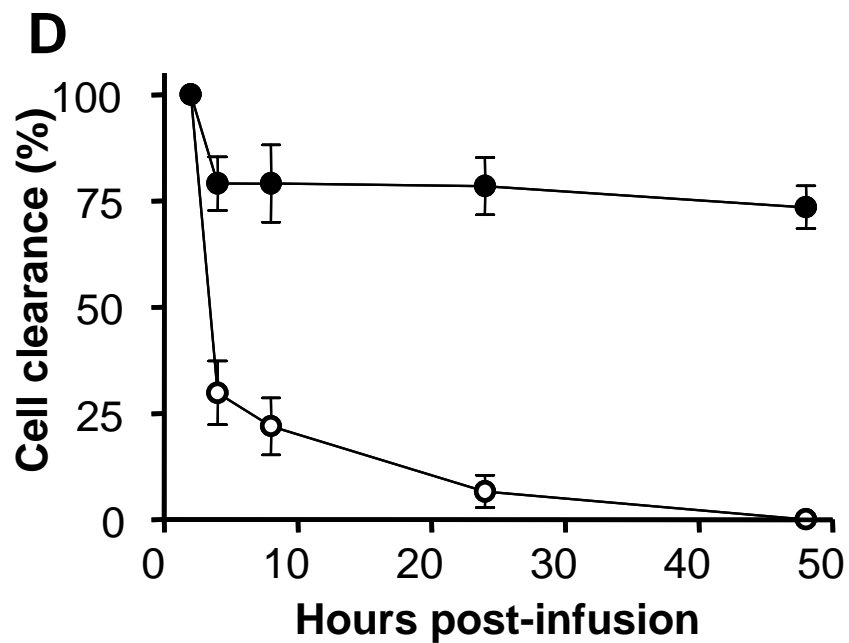

Supplement: blood_blood-2006-04-019794_1.pdf [file blood_blood-2006-04-019794_1.pdf]

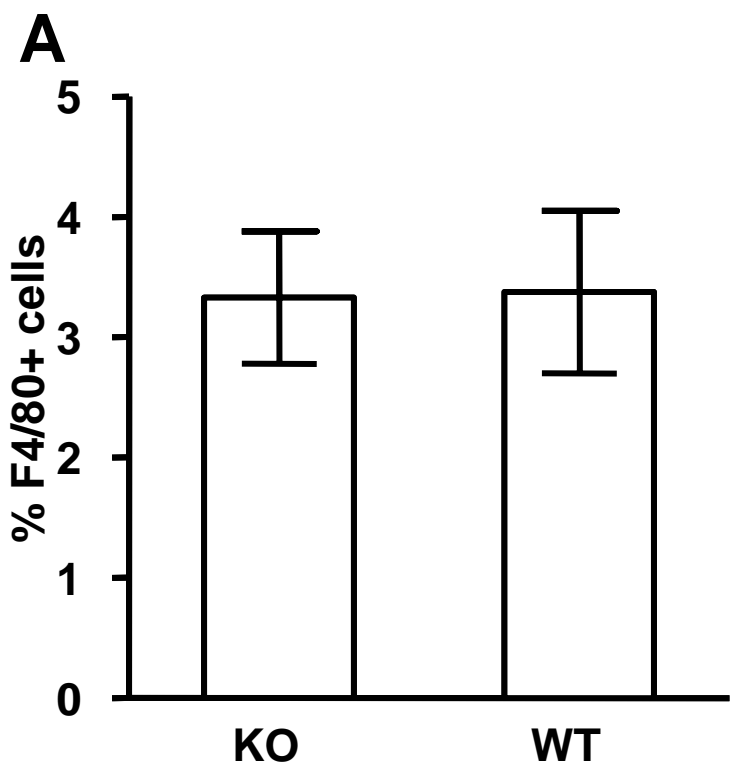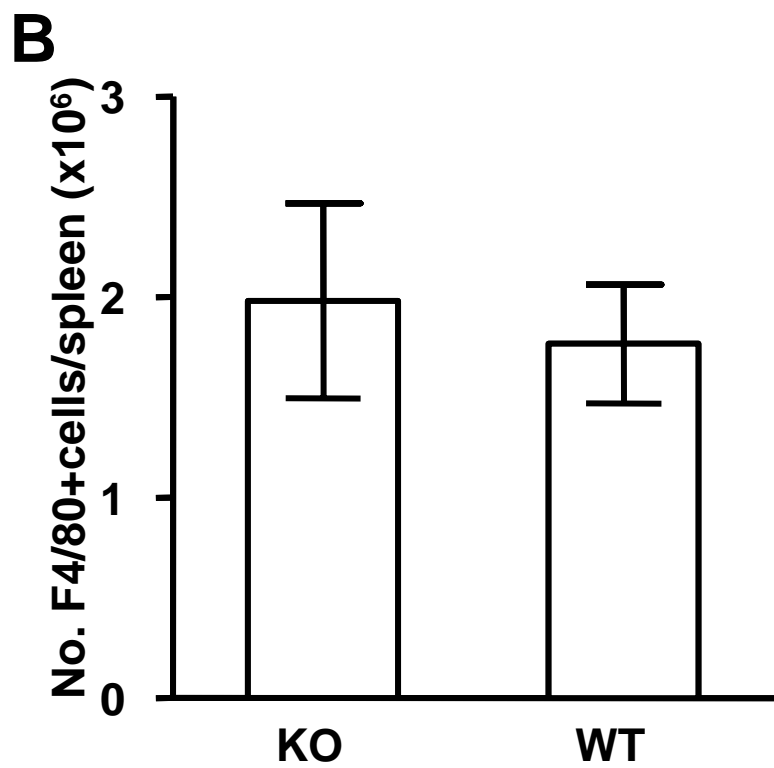

Supplement: blood_blood-2006-04-019794_2.pdf [file blood_blood-2006-04-019794_2.pdf]
